# Supplementary material for: Evolution, dynamic expression changes and regulatory characteristics of gene families involved in the glycerophosphate pathway of triglyceride synthesis in chicken (Gallus gallus)
Source: PubMed Central journal article supplement (PMC6726641; doi:10.1038/s41598-019-48893-9), 2019-09-04
Supplement: 41598_2019_48893_MOESM1_ESM.pdf [file 41598_2019_48893_MOESM1_ESM.pdf]

---

Evolution, dynamic expression changes and regulatory characteristics of  
gene families involved in the glycerophosphate pathway of triglyceride  
synthesis in chicken (*Gallus gallus*)

Liyu Yang<sup>1</sup>, Ziming Liu<sup>1</sup>, Kepeng Ou<sup>2</sup>, Taian Wang<sup>1</sup>, Zhuanjian Li<sup>1,3,4</sup>, Yadong  
Tian<sup>1,3,4</sup>, Yanbin Wang<sup>1,3,4</sup>, Xiangtao Kang<sup>1,3,4</sup>, Hong Li<sup>1,3,4\*</sup>, Xiaojun Liu<sup>1,3,4\*</sup>

<sup>1</sup>College of Animal Science and Veterinary Medicine, Henan Agricultural University,  
Zhengzhou 450002, China

<sup>2</sup>Academic Unit of Ophthalmology, Bristol Medical School, University of Bristol,  
Bristol BS8 1TD, UK

<sup>3</sup>Henan Innovative Engineering Research Center of Poultry Germplasm Resource,  
Zhengzhou 450002, China

<sup>4</sup>International Joint Research Laboratory for Poultry Breeding of Henan, Zhengzhou  
450002, China

\*Corresponding authors.

Xiaojun Liu: xjliu2008@hotmail.com

Hong Li: lihong19871202@163.com

---

---

Supplementary informations

**Table S1.a. The species names and NCBI accession numbers of GPAT family for the phylogenetic tree construction**

| Gene  | Species                                                                          | NCBI accession numbers |
|-------|----------------------------------------------------------------------------------|------------------------|
| GPAT2 | Mm, <i>Mus musculus</i> (house mouse)                                            | NP_001074558.2         |
|       | Dr, <i>Danio rerio</i> (zebrafish)                                               | NP_001082849.1         |
|       | Hs, <i>Homo sapiens</i> (human)                                                  | NP_001082849.1         |
|       | Xt, ( <i>Xenopus</i> ( <i>Silurana</i> ) <i>tropicalis</i> (western clawed frog) | XP_017947975.1         |
|       | Gg, <i>Gallus gallus</i> (chicken)                                               | XP_015128446.1         |
|       | Bt, <i>Bos taurus</i> (cattle)                                                   | NP_001012282.1         |
|       | Fp, <i>Falco peregrinus</i> (peregrine falcons)                                  | NP_001179563.1         |
| GPAM  | Hs, <i>Homo sapiens</i> (human)                                                  | NP_055461.1            |
|       | Bt, <i>Bos taurus</i> (cattle)                                                   | NP_001012282.1         |
|       | Dr, <i>Danio rerio</i> (zebrafish)                                               | XP_009305069.1         |
|       | Xt, ( <i>Xenopus</i> ( <i>Silurana</i> ) <i>tropicalis</i> (western clawed frog) | NP_001072564.1         |
|       | Gg, <i>Gallus gallus</i> (chicken)                                               | NP_001072564.1         |
|       | Mm, <i>Mus musculus</i> (house mouse)                                            | NP_001343214.1         |
|       | Fp, <i>Falco peregrinus</i> (peregrine falcons)                                  | XP_005239302.1         |

---

**Table S1.b. The species names and NCBI accession numbers of AGPAT family for the phylogenetic tree construction**

| Gene                                     | Species                                                   | NCBI accession numbers |
|------------------------------------------|-----------------------------------------------------------|------------------------|
| AGPAT1                                   | Hs,Homo sapiens (human)                                   | NP_006402.1            |
|                                          | Bt, Bos taurus (cattle)                                   | NP_803484.1            |
|                                          | Xt, (Xenopus (Silurana) tropicalis (western clawed frog)  | NP_001090802.1         |
|                                          | Gg, Gallus gallus (chicken)                               | XP_001233846.2         |
|                                          | Mm, Mus musculus (house mouse)                            | NP_001156851.1         |
| AGPAT2                                   | Hs, Homo sapiens (human)                                  | NP_001012745.1         |
|                                          | Bt, Bos taurus (cattle)                                   | NP_001073733.1         |
|                                          | Xt, (Xenopus (Silurana) tropicalis (western clawed frog), | NP_001123741.1         |
|                                          | Gg, Gallus gallus (chicken),                              | XP_001235300.2         |
|                                          | Mm, Mus musculus (house mouse),                           | NP_080488.1            |
|                                          | Dr, Danio rerio (zebrafish),                              | NP_001071200.1         |
| Fp, Falco peregrinus (peregrine falcons) | XP_005231387.1                                            |                        |
| AGPAT3                                   | Hs,Homo sapiens (human)                                   | NP_001032642.1         |
|                                          | Bt, Bos taurus (cattle)                                   | NP_001033135.1         |
|                                          | Xt, Xenopus (Silurana) tropicalis (western clawed frog)   | NP_001008119.1         |
|                                          | Gg, Gallus gallus (chicken)                               | XP_004934657.1         |
|                                          | Mm, Mus musculus (house mouse),                           | NP_443747.2            |
|                                          | Dr, Danio rerio (zebrafish)                               | NP_998590.1            |
| FP, Falco peregrinus (peregrine falcons) | XP_005234551.1                                            |                        |
| AGPAT4                                   | Hs, Homo sapiens (human)                                  | XP_016866548.1         |
|                                          | Bt, Bos taurus (cattle)                                   | NP_001015537.1         |
|                                          | Xt, Xenopus (Silurana) tropicalis (western clawed frog)   | NP_001011265.1         |
|                                          | Gg, Gallus gallus (chicken)                               | XP_419616.2            |
|                                          | Mm, Mus musculus (house mouse),                           | NP_080920.2            |
|                                          | Dr, Danio rerio (zebrafish)                               | NP_001035339.2         |
| Fp, Falco peregrinus (peregrine falcons) | XP_005230336.1                                            |                        |
| AGPAT5                                   | Hs, Homo sapiens (human)                                  | NP_060831.2            |
|                                          | Bt, Bos taurus (cattle)                                   | XP_005225981.1         |
|                                          | Xt, Xenopus (Silurana) tropicalis (western clawed frog)   | NP_001015964.1         |
|                                          | Gg, Gallus gallus (chicken)                               | XP_419916.1            |
|                                          | Mm, Mus musculus (house mouse)                            | NP_081068.1            |
|                                          | Dr, Danio rerio (zebrafish)                               | NP_001070213.2         |
| Fg,Falco peregrinus (peregrine falcons)  | XP_005238188.1                                            |                        |
| AGPAT6                                   | Bt, Bos taurus (cattle)                                   | NP_001077138.1         |
|                                          | Xt, Xenopus (Silurana) tropicalis, (western clawed frog)  | NP_001123822.1         |
|                                          | Gg, Gallus gallus (chicken)                               | XP_015152891.1         |
|                                          | Mm, Mus musculus (house mouse),                           | NP_061213.2            |
|                                          | Dr, Danio rerio (zebrafish)                               | NP_001035339.2         |
|                                          | Fp, Falco peregrinus (peregrine falcons)                  | NP_001123822.1         |
| AGPAT9                                   | Bt, Bos taurus (cattle)                                   | NP_001179443.1         |
|                                          | Xt, Xenopus (Silurana) tropicalis (western clawed frog)   | NP_001087492.1         |
|                                          | Gg, Gallus gallus (chicken)                               | NP_001026316.1         |
|                                          | Mm, Mus musculus (house mouse),                           | NP_766303.1            |
| Dr, Danio rerio (zebrafish)              | NP_001002685.1                                            |                        |

**Table S1.c. The species names and NCBI accession numbers of LPIN family for the phylogenetic tree construction**

| Gene  | Species                                                 | NCBI accession numbers |
|-------|---------------------------------------------------------|------------------------|
| LPIN1 | Hs, Homo sapiens (human)                                | NP_001336136.1         |
|       | Dr, Danio rerio (Zebrafish)                             | NP_001037818.1         |
|       | Gg, Gallus gallus (chicken)                             | XP_015131575.1         |
|       | Mm, Mus musculus (house mouse),                         | NP_001123884.1         |
|       | Xt, Xenopus (Silurana) tropicalis (western clawed frog) | XP_005234551.1         |
|       | Fp, Falco peregrinus (peregrine falcons)                | XP_005238227.1         |
|       | Bt, Bos taurus (cattle)                                 | NP_001193085.2         |
| LPIN2 | Gg, Gallus gallus (chicken)                             | NP_001006386.2         |
|       | Hs, Homo sapiens (human)                                | NP_055461.1            |
|       | Mm, Mus musculus (house mouse),                         | NP_001158357.1         |
|       | Dr, Danio rerio (zebrafish)                             | XP_005163511.1         |
|       | Xt, Xenopus (Silurana) tropicalis (western clawed frog) | NP_001072517.1         |
|       | Bt, Bos taurus (cattle)                                 | XP_010817245.1         |
|       | Fp, Falco peregrinus (peregrine falcons)                | XP_013153869.1         |

**Table S2 List of the genes and primers used for qRT-PCR validation**

| Gene name        | Forward primer(5'-3') | Reward primer(5'-3')  | PCR product |
|------------------|-----------------------|-----------------------|-------------|
| <i>ApoVLDLII</i> | CAATGAAACGGCTAGACTCA  | AACACCGACTTTTCTTCCAA  | 108         |
| <i>β-actin</i>   | GAGAGAAGATGACACAGATC  | GTCCATCACAATACCAGTGG  | 116         |
| <i>GPAM</i>      | TCCATCGAGACCTAATGATAC | TAGACATCACAGCACAGGAC  | 182         |
| <i>GPAT2</i>     | GTTTTCTCTCCACCCACAAG  | CTCAATGCCTGTCCACTCTC  | 155         |
| <i>AGPAT2</i>    | CACCGTCAAGAACATGAGGA  | ACCTCCATCAGCCCCATCAT  | 165         |
| <i>AGPAT3</i>    | AAGACCCAGTTCATTGTTC   | ACCACCATTCCAGCAGCATT  | 180         |
| <i>AGPAT4</i>    | CAGTGGCATAACCTGGAGCA  | CAGCACACCCAGCTGTTTTTC | 246         |
| <i>AGPAT5</i>    | CTGGCACCCATCTCAGTGTT  | CAGGTGAGAGGACGCACAT   | 148         |
| <i>AGPAT6</i>    | CGTTCCTGATCAGCTTG     | CGTCAATGGGGATGTGTGA   | 213         |
| <i>AGPAT9</i>    | GACCGCCATCTAGTGACAAA  | GAACGCATCTCCAAACTGA   | 189         |
| <i>LPIN1</i>     | TAATGAGAGACAAGATGCC   | ATCTTTTATTCTGTTTGCCAT | 165         |
| <i>LPIN2</i>     | CCACATCTCCAATACCACT   | AGTCTCTGTTTCCATAGCAT  | 122         |
